# Supplementary material for: HFE Genotype, Ferritin Levels and Transferrin Saturation in Patients with Suspected Hereditary Hemochromatosis
Source: MDPI journal article supplement (doi:10.3390/genes12081162), 2021-07-28
Supplement: s1 [file s1]

## 1. Supplementary Data

**Table S1.** Genotypic differences in age and iron status.

| Genotypes   |            | Age        |            | Ferritin   |            | Transferrin saturation |            |
|-------------|------------|------------|------------|------------|------------|------------------------|------------|
|             |            | Men        | Women      | Men        | Women      | Men                    | Women      |
| C282Y/C282Y | C282Y/H63D | ≤ 0.01     | ≤ 0.05     | ≤ 0.001    | ns (0.475) | ≤ 0.001                | ≤ 0.001    |
| C282Y/C282Y | H63D/H63D  | ≤ 0.05     | ns (0.236) | ns (0.163) | ns (0.807) | ≤ 0.001                | ns (0.051) |
| C282Y/C282Y | C282Y/wt   | ≤ 0.001    | ns (0.352) | ≤ 0.01     | ns (0.636) | ≤ 0.001                | ≤ 0.001    |
| C282Y/C282Y | H63D/wt    | ≤ 0.001    | ≤ 0.05     | ≤ 0.05     | ns (0.807) | ≤ 0.001                | ≤ 0.001    |
| C282Y/H63D  | H63D/H63D  | ns (0.953) | ns (>0.99) | ns (0.136) | ns (>0.99) | ns (0.195)             | ns (0.348) |
| C282Y/H63D  | C282Y/wt   | ns (0.461) | ns (0.917) | ns (0.272) | ns (0.795) | ≤ 0.001                | ns (0.506) |
| C282Y/H63D  | H63D/wt    | ns (0.249) | ns (0.796) | ≤ 0.05     | ns (0.276) | ≤ 0.001                | ns (0.148) |
| H63D/H63D   | C282Y/wt   | ns (0.574) | ns (0.876) | ns (0.222) | ns (0.755) | ns (0.098)             | ns (0.189) |
| H63D/H63D   | H63D/wt    | ns (0.271) | ns (>0.99) | ns (0.763) | ns (0.648) | ≤ 0.01                 | ns (0.097) |
| C282Y/wt    | H63D/wt    | ns (0.642) | ns (0.974) | ns (0.160) | ns (0.636) | ≤ 0.05                 | ns (0.883) |

\* Medians of parameters in respective genotypes have been pairwise compared using Mann-Whitney *U*-test

wt, wildtype; ns, not significant.

The table demonstrates genotypic differences in age and iron status expressed as *p*-values\*.

Table S2. Correlation between ferritin, age, and biochemical parameters.

| Genotype    | Age   |         |        |         | Transferrin saturation |         |       |         | CRP   |         |        |         | ALAT  |         |       |         | GGT   |         |        |            |
|-------------|-------|---------|--------|---------|------------------------|---------|-------|---------|-------|---------|--------|---------|-------|---------|-------|---------|-------|---------|--------|------------|
|             | Men   |         | Women  |         | Men                    |         | Women |         | Men   |         | Women  |         | Men   |         | Women |         | Men   |         | Women  |            |
|             | r     | p-value | r      | p-value | r                      | p-value | r     | p-value | r     | p-value | r      | p-value | r     | p-value | r     | p-value | r     | p-value | r      | p-value    |
| C282Y/C282Y | 0.450 | ≤ 0.001 | 0.3937 | ≤ 0.01  | 0.306                  | ≤ 0.01  | 0.138 | ns      | 0.181 | ns      | 0.4287 | < 0.01  | 0.421 | ≤ 0.001 | 0.212 | ns      | 0.240 | ≤ 0.05  | 0.1732 | ns (0.261) |
|             | 3     |         |        |         | 4                      |         | 4     | (0.370) | 7     | (0.088) |        |         | 9     |         | 1     | (0.166) | 5     |         |        |            |
| C282Y/H63D  | 0.205 | ns      | 0.2597 | ns      | 0.050                  | ns      | 0.243 | ns      | 0.338 | ≤ 0.01  | -      | ns      | 0.354 | ≤ 0.01  | 0.540 | ≤ 0.05  | 0.418 | ≤ 0.001 | 0.1232 | ns (0.594) |
| D           | 6     | (0.095) |        | (0.255) | 2                      | (0.686) | 2     | (0.288) | 4     |         | 0.2119 | (0.369) | 9     |         | 3     |         | 0     |         |        |            |
| H63D/H63D   | 0.096 | ns      | -      | ns      | 0.162                  | ns      | 0.820 | ns      | 0.111 | ns      | 0.2108 | ns      | 0.542 | ≤ 0.05  | 0.974 | ≤ 0.05  | 0.279 | ns      | 0.9000 | ns (0.083) |
|             | 1     | (0.678) | 0.1000 | (0.950) |                        | (0.482) | 8     | (0.133) | 2     | (0.631) |        | (0.833) | 9     |         | 7     |         | 3     | (0.220) |        |            |
| C282Y/wt    | 0.200 | ns      | 0.3571 | ns      | 0.109                  | ns      | 0.630 | ns      | 0.398 | ≤ 0.01  | -      | ns      | 0.261 | ≤ 0.05  | 0.357 | ns      | 0.357 | ≤ 0.01  | -      | ns (0.138) |
|             | 5     | (0.112) |        | (0.444) | 7                      | (0.388) | 7     | (0.141) | 6     |         | 0.4364 | (0.339) | 1     |         | 1     | (0.444) | 8     |         | 0.6429 |            |
| H63D/wt     | 0.072 | ns      | 0.2256 | ns      | 0.301                  | ≤ 0.05  | 0.147 | ns      | 0.036 | ns      | 0.5448 | ≤ 0.05  | 0.147 | ns      | 0.399 | ns      | 0.775 | ns      | 0.4503 | ns (0.081) |
|             | 0     | (0.790) |        | (0.381) | 1                      |         | 5     | (0.582) | 2     | (0.769) |        |         | 6     | (0.226) | 6     | (0.125) | 5     | (0.526) |        |            |
| Total       | 0.219 | ≤ 0.001 | 0.3038 | ≤ 0.01  | 0.240                  | ≤ 0.001 | 0.189 | ns      | 0.205 | ≤ 0.001 | 0.2368 | ≤ 0.05  | 0.290 | ≤ 0.001 | 0.309 | ≤ 0.01  | 0.206 | ≤ 0.001 | 0.1990 | ns (0.055) |
|             | 3     |         |        |         | 9                      |         | 6     | (0.068) | 2     |         |        |         | 6     |         | 1     |         | 1     |         |        |            |

The table demonstrates correlation between ferritin and age, transferrin saturation, C-reactive protein (CRP), alanine aminotransferase (ALAT) and gamma-glutamyl transferase (GGT).

1

2

3

4
